# Supplementary material for: Very high solubilities of hydrogenated n-alkyl CO2-philes in supercritical carbon dioxide at moderately low temperature and pressuresElectronic supplementary information (ESI) available: colour version of Fig. 1. See http://www.rsc.org/suppdata/nj/b3/b317037c/
Source: Royal Society of Chemistry journal article supplement (doi:10.1039/b317037c), 2004-01-01
Supplement: b317037c.doc [file b317037c.doc]

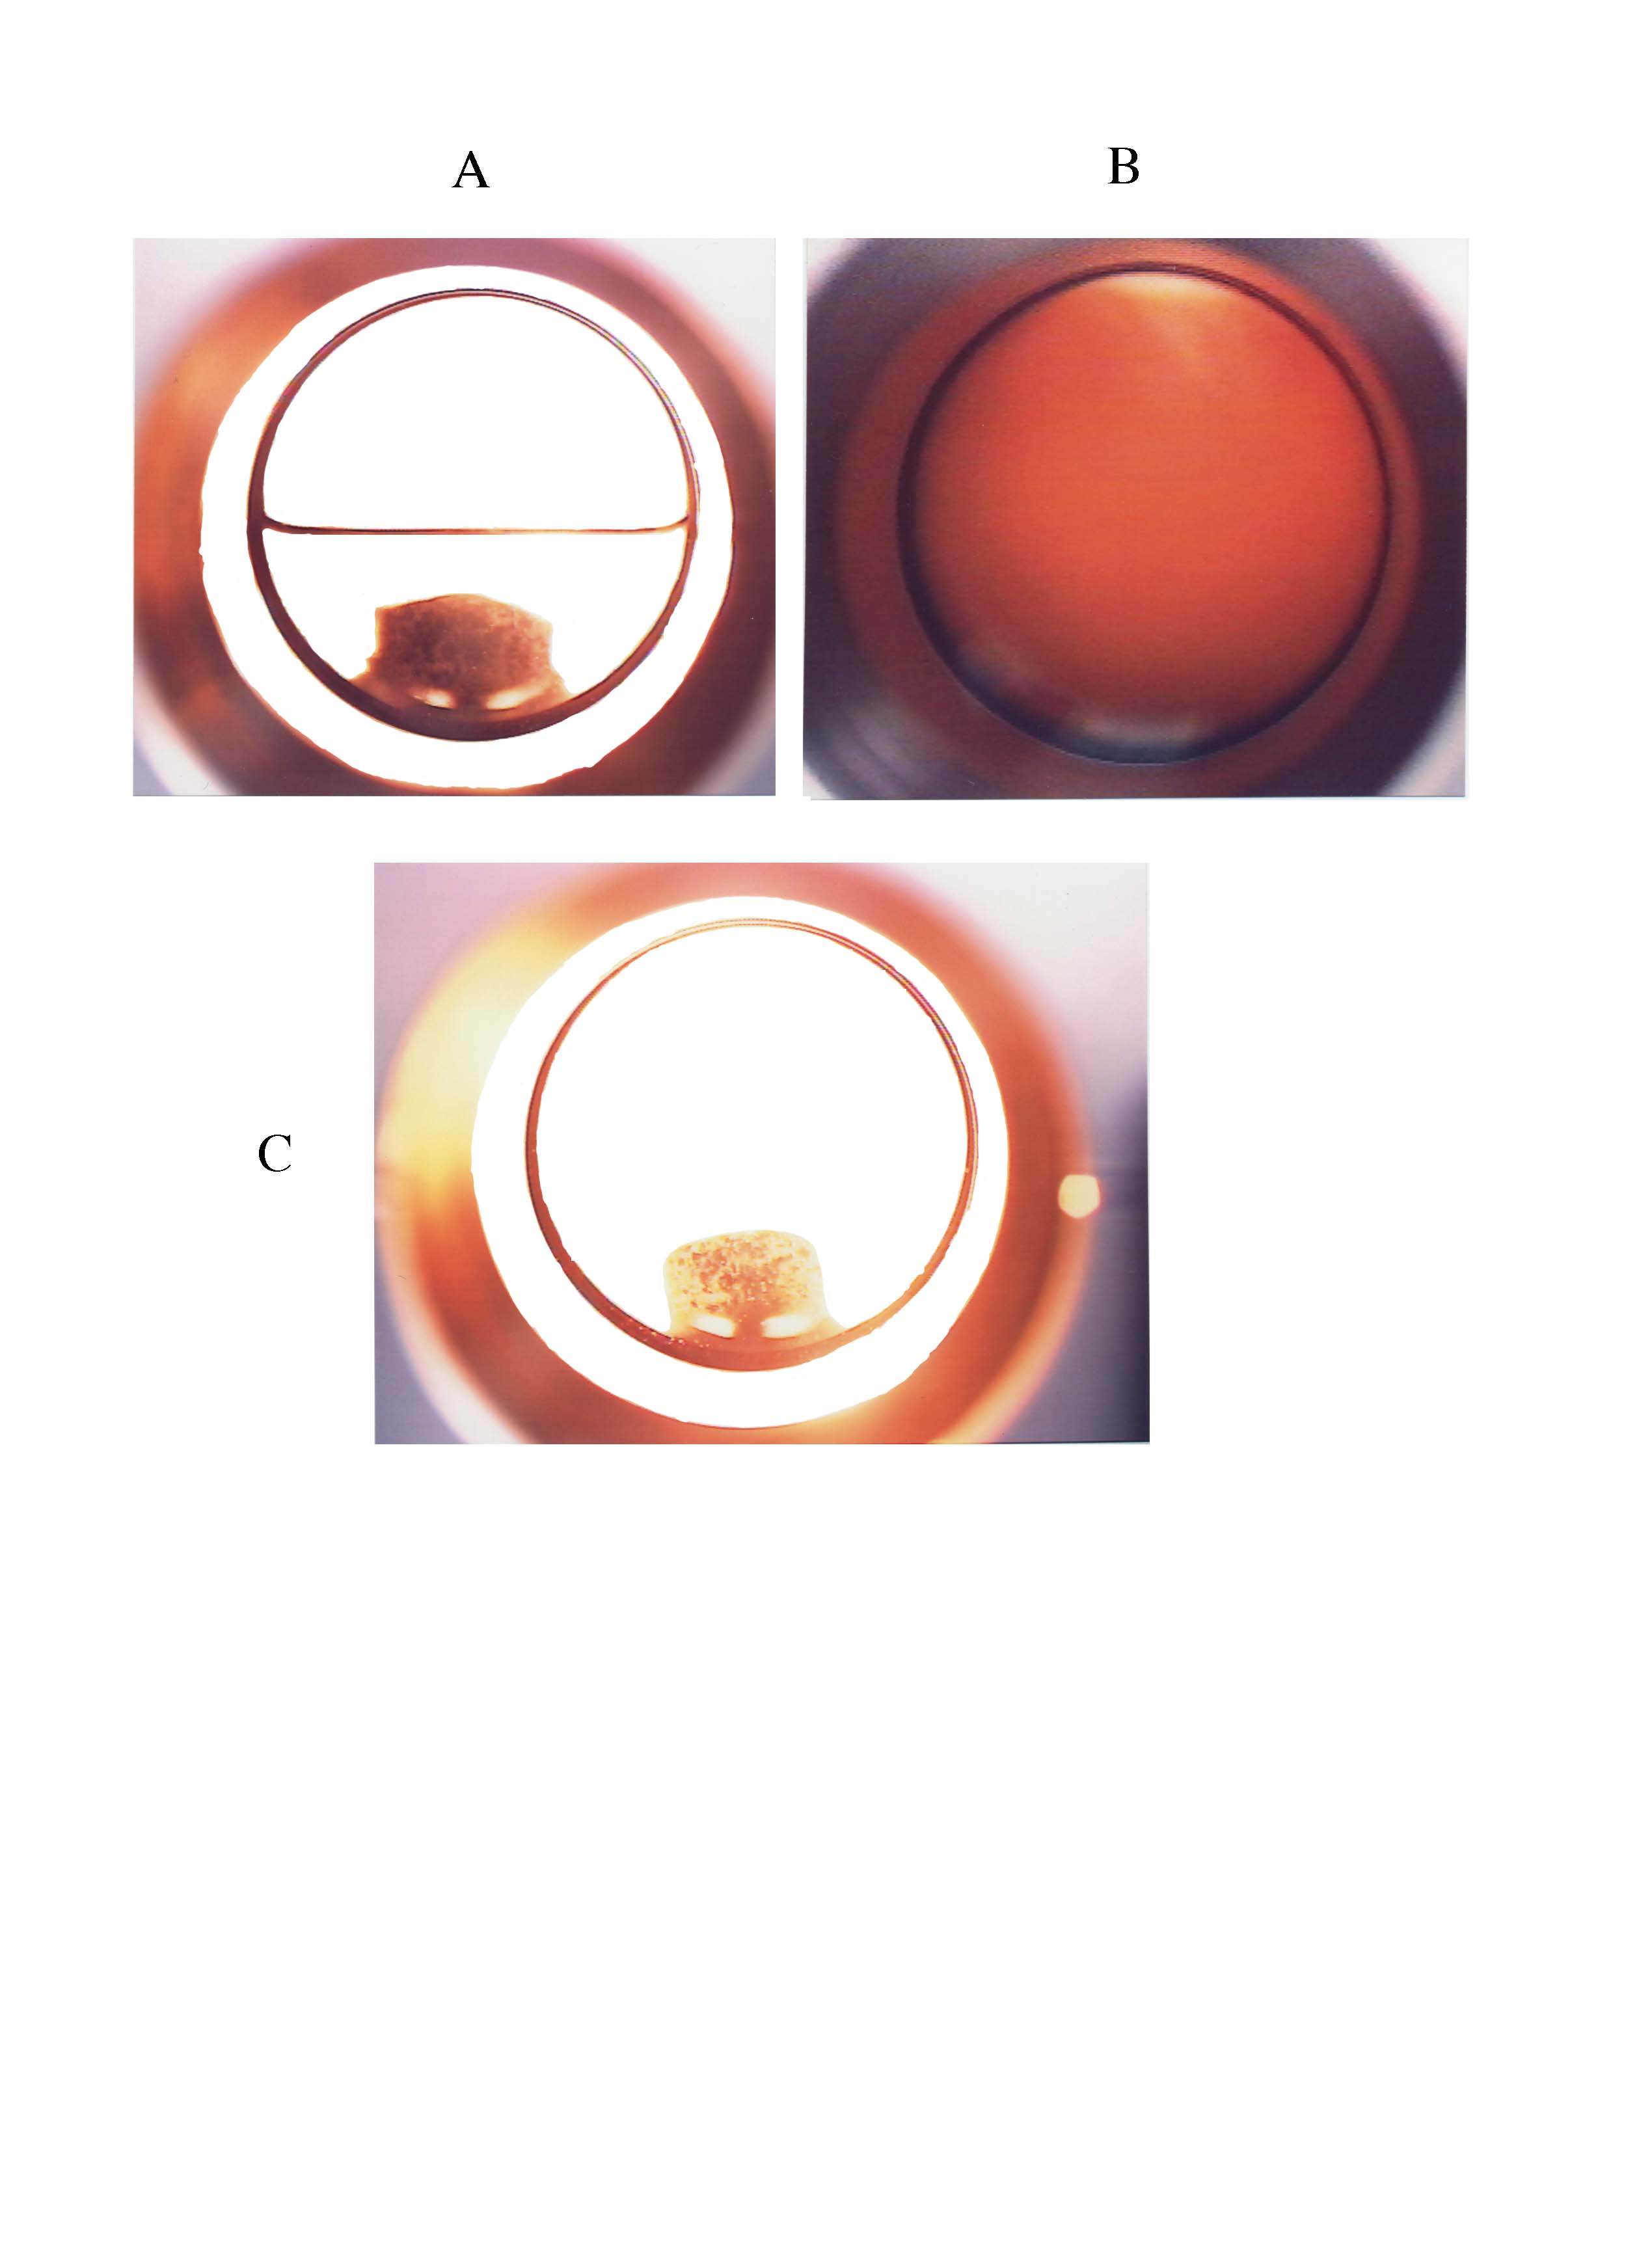


Photographs illustrating cloud point determination in the high-pressure view cell containing containing ethylene glycol mono *n*-dedecyl ether (2.82 g) in SC CO2 at 308 K and various pressures; (A) 1 to <17.4 MPa stirrer is off, (B) 1 to <17.4 MPa stirrer is on, and (C) 17.4 MPa stirrer is on.
